# Supplementary material
Source: PubMed Central journal article supplement (PMC3444169)
Supplement: NIHMS343072-supplement-Supp_data.pdf [file NIHMS343072-supplement-Supp_data.pdf]

## **Supplemental Information**

### **Differential Expression of Ly6C and T-bet**

### **Distinguish Effector and Memory Th1 CD4<sup>+</sup>**

### **Cell Properties during Viral Infection**

**Heather D. Marshall, Anmol Chandele, Yong Woo Jung, Hailong Meng, Amanda C. Poholek, Ian A. Parish, Rachel Rutishauser, Weiguo Cui, Steven H. Kleinstein, Joe Craft, and Susan M. Kaech**

#### Inventory of Supplemental Information

Figure S1. Comparison of Smarta TCR transgenic and GP<sub>66-77</sub> tetramer<sup>+</sup> CD4 T cells. Associated with Figure 1.

Figure S2. Phenotypes and locations of LCMV-specific CD4 T cell effector and memory subsets. Associated with Figure 3.

Table S1. Top 100 signature genes from each subset relative to naïve. Associated with Figure 6.

Table S2. Differentially expressed transcription factors, chemokines, chemokine receptors, cytokines, and cytokine receptors. Associated with Table 1 and supplied as an Excel spreadsheet. Available online.

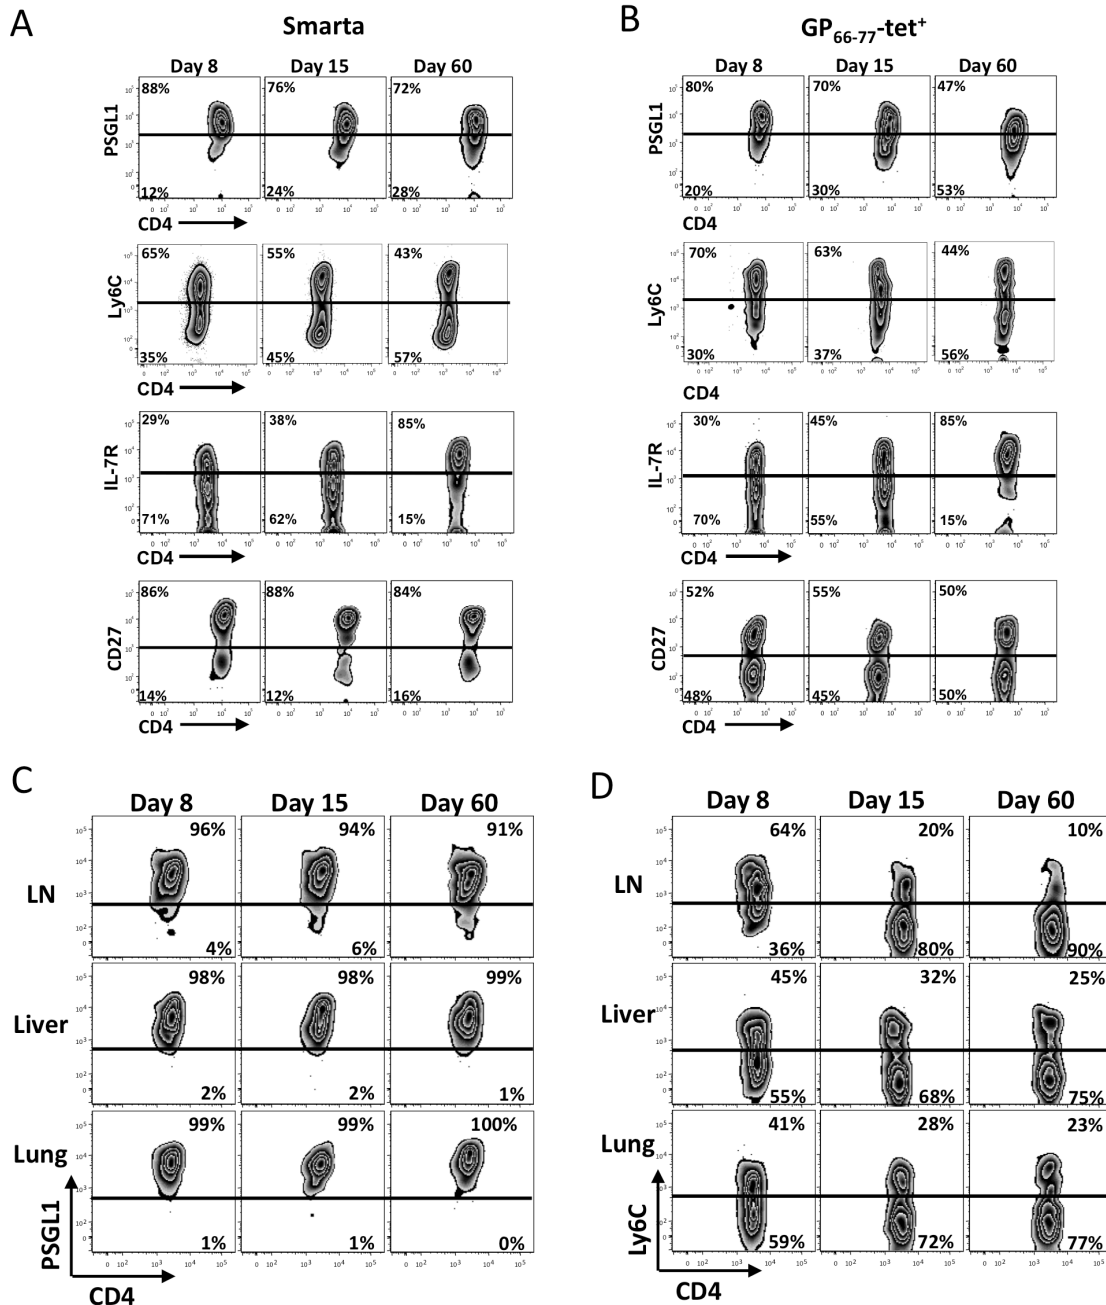

**Figure S1. Comparison of Smarta TCR transgenic and GP<sub>66-77</sub> tetramer+ CD4<sup>+</sup> T cells.** (A) Smarta chimeric mice or (B) C57BL/6 mice were infected with LCMV and the Smarta CD4<sup>+</sup> T cells (A) and GP<sub>66-77</sub> tetramer+ CD4<sup>+</sup> T cells (B) were analyzed for expression of PSGL1, Ly6C, IL-7R, and CD27 at days 8, 15, and 60 p.i. (C) Smarta chimeric mice were infected with LCMV and at days 8, 15, and 60 p.i., the expression of PSGL1 (C) and Ly6C (D) was assessed on Smarta CD4<sup>+</sup> T cells in the inguinal lymph nodes, liver, and lung. Related to Figure 1.

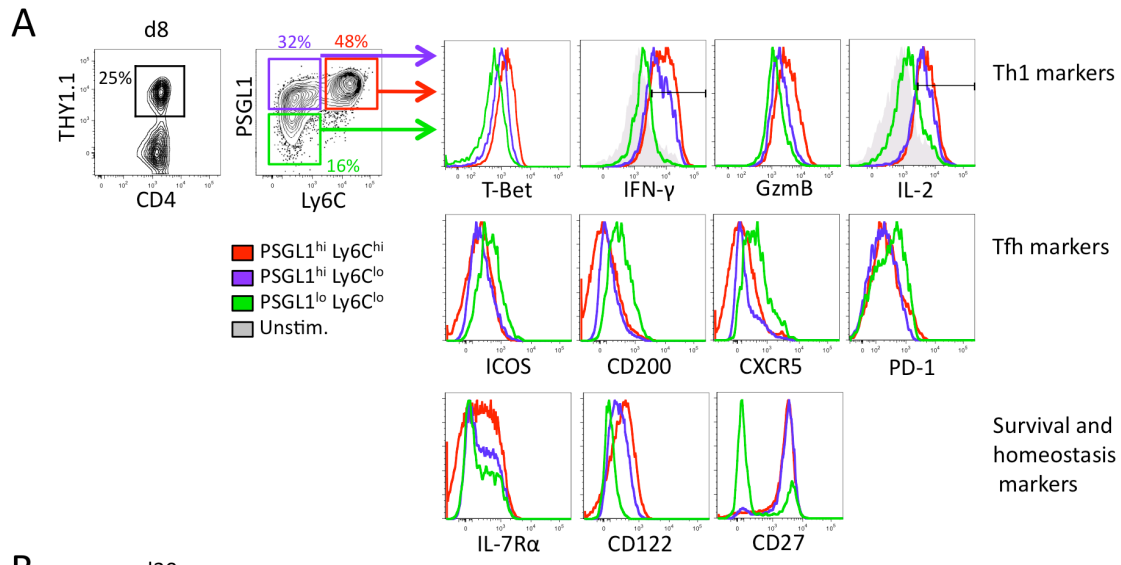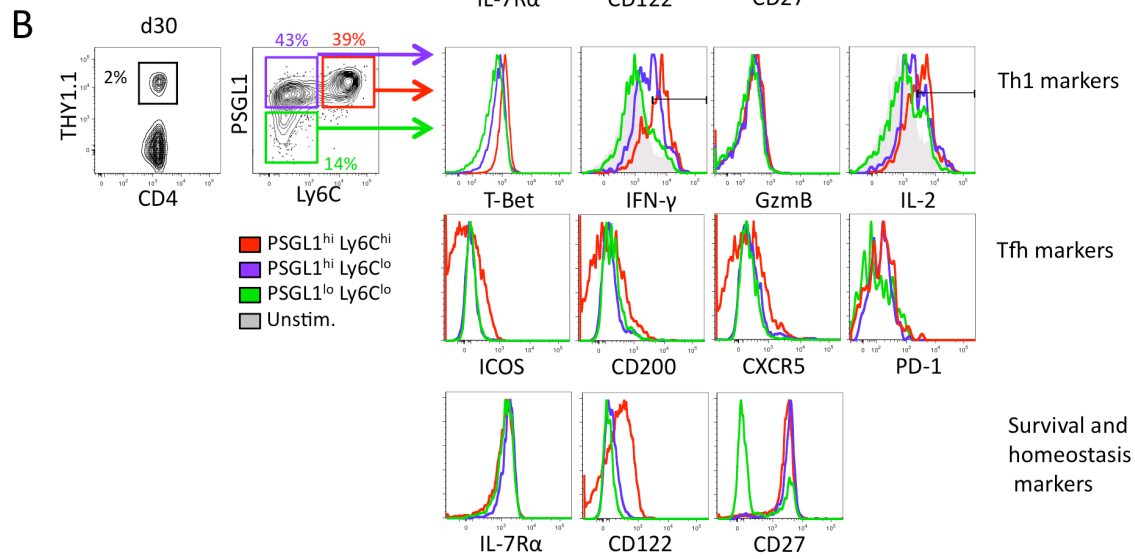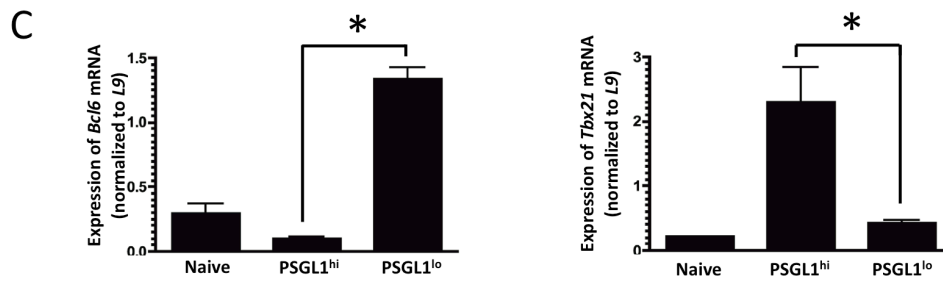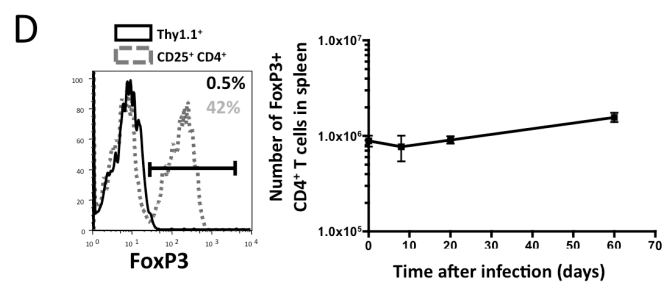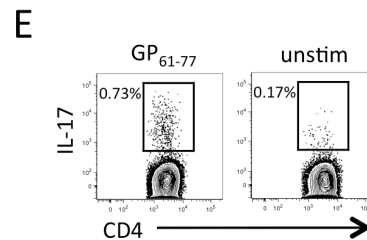

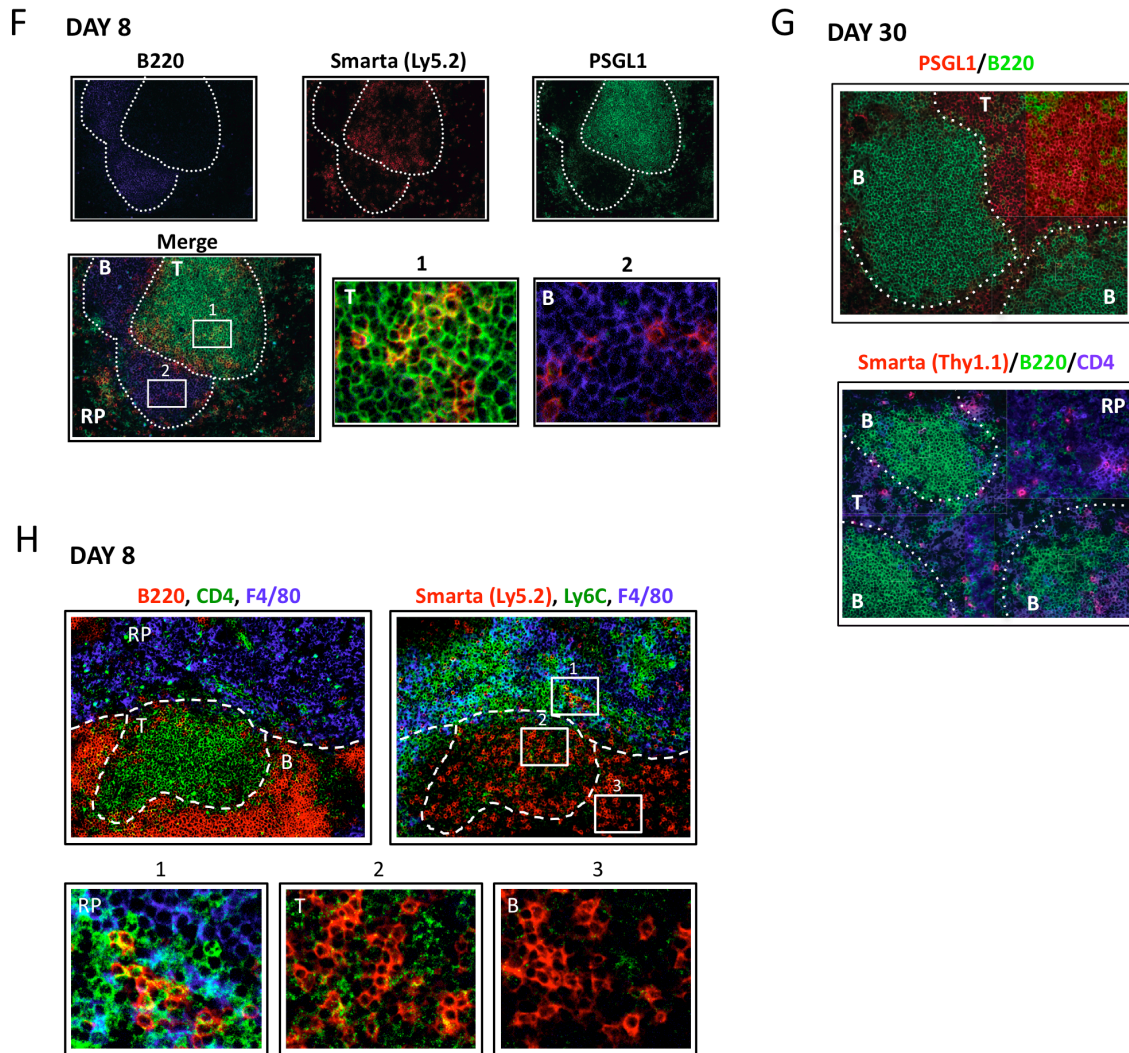

**Figure S2. Phenotypes and locations of LCMV-specific  $CD4^+$  T cell effector and memory subsets.** (A-B) Smarta chimeric mice were infected with LCMV and 8 days (A) or 30 days (B) p.i. splenocytes were stained with antibodies to Thy1.1, PSGL1 and Ly6C and analyzed by flow cytometry for the expression of the indicated proteins. Overlapping histograms show the expression of the indicated proteins on  $PSGL1^{hi}$   $Ly6C^{hi}$  (red histograms),  $PSGL1^{hi}$   $Ly6C^{lo}$  (blue histograms) and  $PSGL1^{lo}$   $Ly6C^{lo}$  cells (green histograms). (C) RT-PCR of *Bcl6* (left) and *Tbx21* (right) mRNA from naïve or  $PSGL1^{hi}$ , and  $PSGL1^{lo}$  Smarta cells at day 8 p.i. (D) FoxP3 staining in Smarta cells ( $Thy1.1^+$ ) or total  $CD25^+$   $CD4^+$  T cells is shown in FACS plots (left). Line graph shows the number of FoxP3<sup>+</sup>  $CD4^+$  T cells throughout LCMV infection (right). (E) Smarta  $CD4^+$  T cells were stimulated with GP<sub>61-77</sub> peptide for 5 hours and intracellular accumulation of IL-17 was assessed. \* $p < 0.05$ . (F) Ly5.1<sup>+</sup> mice containing small numbers of Ly5.2<sup>+</sup> Smarta  $CD4^+$  T cells were infected with LCMV and 8 days later the locations of  $PSGL1^{hi}$  and  $PSGL1^{lo}$  effector  $CD4^+$  T cells were examined in the spleen. Frozen splenic sections were stained for Ly5.2<sup>+</sup> Smarta cells (red), B220 (blue), and PSGL1 (green). Dotted line delineates the B and T cell zones and magnified views of boxed areas #1 and #2 are shown. (G) At day 30, frozen sections were stained for PSGL1 (red) and

B220 (green) on the left or Thy1,1+ Smarta cells (red), B220 (green), and CD4 (blue) on the right. (H) Day 8 frozen sections were stained for B220 (red), CD4 (green), and F4/80 (blue) on the left or Ly5.2+ Smarta (red), Ly6C (green), and F4/80 (blue) on the right. Magnified views of boxed areas are shown. Each experiment is a representative of three independent animals. Related to Figure 3.

**Supplemental Table 1. Top 100 signature genes for each effector and memory subset.**

|               | day 8<br>PSGL1 <sup>lo</sup> Ly6C <sup>lo</sup><br>Naive |               | day 8<br>PSGL1 <sup>hi</sup> Ly6C <sup>hi</sup><br>Naive |               | day 8<br>PSGL1 <sup>hi</sup> Ly6C <sup>lo</sup><br>Naive |               | day 60<br>PSGL1 <sup>hi</sup> Memory<br>Naive |             |
|---------------|----------------------------------------------------------|---------------|----------------------------------------------------------|---------------|----------------------------------------------------------|---------------|-----------------------------------------------|-------------|
|               | Gene                                                     | Fold change   | Gene                                                     | Fold change   | Gene                                                     | Fold change   | Gene                                          | Fold change |
| Lag3          | 70.38                                                    | Lgals3        | 148.58                                                   | Erdr1         | 82.17                                                    | Erdr1         | 72.44                                         |             |
| Erdr1         | 67.19                                                    | Nkg7          | 143.36                                                   | Cxcr3         | 59.23                                                    | Cxcr3         | 56.40                                         |             |
| Sostdc1       | 63.86                                                    | Erdr1         | 122.71                                                   | Ccl5          | 50.52                                                    | Ccl5          | 51.48                                         |             |
| Cxcr5         | 38.14                                                    | Ccl4          | 116.57                                                   | Nkg7          | 45.57                                                    | Serpina3g     | 36.06                                         |             |
| Cxcr5         | 35.87                                                    | Ccl5          | 97.93                                                    | Lgals3        | 34.34                                                    | Nkg7          | 35.12                                         |             |
| 1810009J06Rik | 33.78                                                    | Ifng          | 95.63                                                    | Serpina3g     | 34.24                                                    | Myo1f         | 31.31                                         |             |
| Il1r2         | 33.39                                                    | LOC381140     | 84.49                                                    | Myo1f         | 33.16                                                    | Lyz           | 29.36                                         |             |
| Rgs16         | 32.64                                                    | AA467197      | 76.97                                                    | Ccl4          | 31.97                                                    | Casp1         | 27.53                                         |             |
| LOC381140     | 32.45                                                    | Cxcr3         | 76.23                                                    | Casp1         | 31.83                                                    | Igk-C         | 26.74                                         |             |
| Bhlhb2        | 30.84                                                    | Ifng          | 70.91                                                    | Lag3          | 30.93                                                    | LOC100047628  | 25.67                                         |             |
| Spp1          | 28.58                                                    | Bhlhb2        | 69.17                                                    | Zbtb32        | 28.79                                                    | LOC100047788  | 25.38                                         |             |
| Casp1         | 24.65                                                    | Plac8         | 62.62                                                    | LOC381140     | 27.28                                                    | Lag3          | 22.23                                         |             |
| Smtn          | 24.33                                                    | Myo1f         | 59.16                                                    | Bhlhb2        | 27.00                                                    | LOC100047419  | 21.68                                         |             |
| 0610007P22Rik | 23.78                                                    | Tbx21         | 58.36                                                    | Ifng          | 24.03                                                    | Zbtb32        | 19.37                                         |             |
| Cxcr5         | 22.97                                                    | Ifitm1        | 52.13                                                    | LOC100047419  | 23.42                                                    | S100a6        | 19.18                                         |             |
| Il21          | 22.95                                                    | Mt1           | 49.97                                                    | S100a6        | 23.32                                                    | Ccr6          | 18.84                                         |             |
| Sccpdh        | 22.94                                                    | Emp1          | 43.17                                                    | Ccr6          | 20.55                                                    | Asb2          | 18.56                                         |             |
| 0610007P22Rik | 22.92                                                    | LOC100047788  | 41.00                                                    | Il1r2         | 19.98                                                    | Tbx21         | 18.05                                         |             |
| Il4           | 22.64                                                    | Pik3ap1       | 38.31                                                    | Asb2          | 19.87                                                    | Lgals3        | 17.34                                         |             |
| Slc24a3       | 22.62                                                    | Osbpl3        | 37.29                                                    | Osbpl3        | 19.42                                                    | Bhlhb2        | 17.18                                         |             |
| Cxcr3         | 22.59                                                    | Casp1         | 37.18                                                    | Casp4         | 19.38                                                    | Igh-VJ558     | 16.99                                         |             |
| Serpina3g     | 22.11                                                    | Smpdl3b       | 36.93                                                    | Tbx21         | 18.62                                                    | Itgae         | 16.41                                         |             |
| Stx11         | 21.99                                                    | Gldc          | 36.33                                                    | Stx11         | 18.27                                                    | Itgae         | 16.24                                         |             |
| Asb2          | 21.33                                                    | Kcnk5         | 32.64                                                    | Emp1          | 17.21                                                    | Casp4         | 15.39                                         |             |
| Nrbp2         | 21.18                                                    | Ahnak         | 32.60                                                    | Itgae         | 16.87                                                    | LOC381140     | 14.96                                         |             |
| LOC100047419  | 21.11                                                    | S100a4        | 31.75                                                    | Ifng          | 16.28                                                    | Tnfsf14       | 14.72                                         |             |
| Bzrap1        | 20.18                                                    | Gp49a         | 31.58                                                    | 0610007P22Rik | 16.12                                                    | Serpina3f     | 14.35                                         |             |
| Ryk           | 19.55                                                    | Cxcr6         | 31.47                                                    | Itgae         | 15.96                                                    | Emp1          | 13.57                                         |             |
| Synpo         | 19.28                                                    | Ccl3          | 31.40                                                    | Anxa2         | 15.79                                                    | Osbpl3        | 13.28                                         |             |
| LOC100047611  | 19.08                                                    | Rbm47         | 31.21                                                    | Ahnak         | 14.60                                                    | Ifng          | 13.24                                         |             |
| BC029169      | 18.45                                                    | S100a6        | 29.29                                                    | 0610007P22Rik | 14.12                                                    | Bzrap1        | 13.21                                         |             |
| Casp4         | 18.19                                                    | Zbtb32        | 29.08                                                    | Esm1          | 13.91                                                    | 0610007P22Rik | 13.17                                         |             |
| Zbtb32        | 17.84                                                    | Ccl4          | 28.60                                                    | LOC100047611  | 13.81                                                    | 0610007P22Rik | 13.12                                         |             |
| Cd83          | 17.77                                                    | A230057G18Rik | 28.06                                                    | Tnfsf14       | 13.74                                                    | Ahnak         | 12.52                                         |             |
| Npas4         | 16.41                                                    | Ahnak         | 27.61                                                    | Plac8         | 13.71                                                    | Al324046      | 12.41                                         |             |
| Ifng          | 16.18                                                    | LOC100047934  | 25.05                                                    | Cxcr5         | 13.59                                                    | Xcl1          | 11.91                                         |             |
| Smtn          | 15.89                                                    | Casp4         | 24.15                                                    | Rgs16         | 13.48                                                    | Chst2         | 11.86                                         |             |
| Igk-C         | 15.81                                                    | Garnl4        | 23.59                                                    | Serpina3f     | 13.12                                                    | Cxcr5         | 11.81                                         |             |
| Esm1          | 15.76                                                    | Podnl1        | 23.58                                                    | Bzrap1        | 12.99                                                    | Stx11         | 11.44                                         |             |
| Angptl2       | 15.67                                                    | Havcr2        | 23.33                                                    | Ccr6          | 12.01                                                    | Nrn1          | 11.23                                         |             |
| Tiam1         | 15.55                                                    | Il18rap       | 23.31                                                    | Smpdl3b       | 12.00                                                    | Nrp1          | 11.16                                         |             |
| LOC100047628  | 15.03                                                    | LOC100047628  | 23.17                                                    | Cxcr5         | 11.98                                                    | Ccl4          | 11.16                                         |             |
| Nrn1          | 14.68                                                    | Lrrk1         | 23.14                                                    | Synpo         | 11.78                                                    | Ahnak         | 10.94                                         |             |
| Ecel1         | 14.54                                                    | Anxa2         | 23.13                                                    | Ryk           | 11.63                                                    | Nrp1          | 10.69                                         |             |
| Tmem2         | 14.29                                                    | Esm1          | 23.10                                                    | Chst2         | 11.50                                                    | Anxa2         | 10.60                                         |             |
| Gna14         | 14.06                                                    | Cx3cr1        | 22.95                                                    | Zcchc18       | 11.49                                                    | Cxcr6         | 10.49                                         |             |
| Nrp1          | 13.89                                                    | Igk-C         | 22.43                                                    | S100a4        | 11.39                                                    | Ccr6          | 10.27                                         |             |
| Nrp1          | 13.87                                                    | LOC100047419  | 20.60                                                    | Ahnak         | 11.32                                                    | Tiam1         | 10.12                                         |             |
| Chst2         | 13.82                                                    | Klrg1         | 20.32                                                    | Nrp1          | 11.15                                                    | Zcchc18       | 10.06                                         |             |
| Muc16         | 13.59                                                    | Popdc2        | 20.20                                                    | Nrp1          | 10.95                                                    | Plac8         | 9.85                                          |             |
| LOC100046232  | 13.25                                                    | 0610007P22Rik | 19.59                                                    | Kcnk5         | 10.80                                                    | Cxcr5         | 9.48                                          |             |

Top 100 "signature genes"

Top 100 "signature genes" cont.

| d8 PSGL1 <sup>lo</sup> /naive |             | d8 PSGL1 <sup>hi</sup><br>Ly6c <sup>hi</sup> /naive |             | d8 PSGL1 <sup>hi</sup><br>Ly6c <sup>lo</sup> /naive |             | Memory<br>PSGL1 <sup>hi</sup> /naive |             |
|-------------------------------|-------------|-----------------------------------------------------|-------------|-----------------------------------------------------|-------------|--------------------------------------|-------------|
| Gene                          | Fold change | Gene                                                | Fold change | Gene                                                | Fold change | Gene                                 | Fold change |
| Myo1f                         | 13.18       | LOC100047167                                        | 19.15       | Igk-C                                               | 10.72       | Il1r2                                | 9.28        |
| Ifng                          | 13.05       | Ccr5                                                | 18.70       | Tiam1                                               | 10.69       | Scppdh                               | 9.27        |
| Tmem2                         | 12.97       | Ilgad                                               | 18.35       | Podnl1                                              | 10.56       | Gpr68                                | 9.17        |
| 1700019D03Rik                 | 12.66       | 0610007P22Rik                                       | 18.29       | LOC100047628                                        | 10.42       | Ryk                                  | 9.16        |
| S100a6                        | 12.48       | Ahnak                                               | 17.92       | Tmem2                                               | 10.29       | Lyzs                                 | 9.03        |
| Vdr                           | 11.92       | Osbpl3                                              | 17.86       | Ebi3                                                | 10.06       | Ifng                                 | 8.98        |
| Abhd4                         | 11.70       | Havcr2                                              | 17.82       | Nrn1                                                | 9.80        | LOC100047611                         | 8.98        |
| Osbpl3                        | 11.55       | Plek                                                | 17.61       | 2810439F02Rik                                       | 9.77        | Rgs16                                | 8.95        |
| Nrp                           | 11.45       | Tnfsf14                                             | 17.51       | Gpr68                                               | 9.75        | S100a4                               | 8.92        |
| Krt17                         | 11.44       | Rora                                                | 17.37       | Tspan17                                             | 9.60        | Podnl1                               | 8.90        |
| Ttbk1                         | 11.34       | Ltb4r1                                              | 17.14       | Gp49a                                               | 9.50        | Esm1                                 | 8.89        |
| Tnfsf14                       | 11.19       | Popdc2                                              | 17.13       | Scppdh                                              | 9.46        | 2810439F02Rik                        | 8.35        |
| Pex11a                        | 11.07       | Stx11                                               | 16.78       | Osbpl3                                              | 9.45        | Kcnk5                                | 8.22        |
| Cd22                          | 10.95       | Tcrb-V8.3                                           | 16.69       | Axl                                                 | 9.25        | Synpo                                | 8.21        |
| 6330403K07Rik                 | 10.42       | Atxn1                                               | 16.66       | Klrg1                                               | 9.20        | Axl                                  | 8.09        |
| Tspan17                       | 10.42       | 2810439F02Rik                                       | 16.36       | Cxcr6                                               | 9.15        | Tspan17                              | 8.05        |
| Pex11a                        | 10.32       | F2rl2                                               | 16.07       | Casp4                                               | 9.03        | Klk1b27                              | 7.91        |
| B4galnt4                      | 10.26       | Lag3                                                | 16.06       | Cd83                                                | 8.96        | 6430511F03                           | 7.78        |
| Axl                           | 10.07       | 6430511F03                                          | 15.88       | Xcl1                                                | 8.77        | Al324046                             | 7.78        |
| Ryk                           | 9.98        | Ifitm1                                              | 15.59       | Rora                                                | 8.73        | Rora                                 | 7.71        |
| Coro2b                        | 9.86        | Prc1                                                | 15.50       | Sostdc1                                             | 8.63        | Cd83                                 | 7.68        |
| Trat1                         | -10.33      | Gna15                                               | 15.14       | 2810439F02Rik                                       | 8.62        | Slc24a3                              | 7.68        |
| Slc16a5                       | -10.59      | Sytl3                                               | 14.79       | Ltb4r1                                              | 8.56        | Casp4                                | 7.67        |
| 2310010M24Rik                 | -10.92      | F730045P10Rik                                       | 14.75       | 6330403K07Rik                                       | 8.36        | Bmp7                                 | 7.65        |
| Rpl29                         | -11.32      | 1500009L16Rik                                       | 14.25       | Slc24a3                                             | 8.28        | Lyz2                                 | 7.62        |
| Satb1                         | -11.58      | Ifitm3                                              | 14.15       | 5033430115Rik                                       | 8.11        | Il4                                  | 7.60        |
| Rps6                          | -11.97      | Dapk2                                               | 14.05       | LOC100045542                                        | 8.08        | Ikzf2                                | 7.51        |
| Sema4a                        | -12.30      | 2310010M24Rik                                       | -13.02      | Ahnak                                               | 8.04        | Nrp                                  | 7.51        |
| Prkd3                         | -12.58      | scl0001132.1_96                                     | -13.58      | Slc15a3                                             | 8.03        | Osbpl3                               | 7.50        |
| Actn1                         | -12.92      | Ttc28                                               | -14.53      | LOC100046232                                        | 7.96        | Actg2                                | 7.41        |
| LOC100041103                  | -13.21      | Ephx1                                               | -15.18      | Rilpl2                                              | 7.85        | Klrg1                                | 7.41        |
| Pdlim1                        | -13.51      | Dapl1                                               | -18.52      | Endod1                                              | 7.84        | Smpd13b                              | 7.40        |
| Klrd1                         | -13.69      | Tmem108                                             | -18.90      | Amigo2                                              | -7.62       | 2810439F02Rik                        | 7.39        |
| Gpr18                         | -13.84      | LOC100041103                                        | -20.68      | Myo6                                                | -7.65       | Inpp1                                | 7.11        |
| Tmem108                       | -14.11      | Ampd1                                               | -21.52      | Slc16a5                                             | -8.39       | Tmem2                                | 7.10        |
| Actn2                         | -14.15      | Atp1b1                                              | -24.90      | Nme7                                                | -8.55       | Amigo2                               | -6.42       |
| Dapl1                         | -14.59      | Tmie                                                | -25.26      | Dapl1                                               | -9.03       | Dapl1                                | -6.75       |
| Ampd1                         | -14.75      | Amigo2                                              | -26.20      | A530021J07Rik                                       | -10.22      | Nme7                                 | -6.79       |
| Amigo2                        | -16.60      | Nme7                                                | -28.03      | Amigo2                                              | -10.60      | Nme7                                 | -8.26       |
| EG666577                      | -17.65      | Ramp1                                               | -28.64      | Nme7                                                | -11.00      | Nme7                                 | -8.30       |
| Myo6                          | -18.44      | Gpr83                                               | -30.14      | Tmem108                                             | -11.13      | Amigo2                               | -8.39       |
| Ampd1                         | -23.36      | Ampd1                                               | -32.43      | Nme7                                                | -11.60      | A530021J07Rik                        | -9.17       |
| Satb1                         | -28.09      | Nme7                                                | -33.52      | Atp1b1                                              | -11.61      | Atp1b1                               | -9.23       |
| A530021J07Rik                 | -32.38      | Slc16a5                                             | -39.92      | Ampd1                                               | -13.40      | Pdlim4                               | -9.61       |
| Ly6c1                         | -43.68      | A530021J07Rik                                       | -42.80      | Pdlim4                                              | -13.59      | Tmem108                              | -10.36      |
| Sell                          | -55.40      | Sell                                                | -67.43      | Ly6c1                                               | -15.26      | Ampd1                                | -12.08      |
| Igfbp4                        | -59.58      | Pdlim4                                              | -68.46      | Ampd1                                               | -18.18      | Igfbp4                               | -14.50      |
| Pdlim4                        | -71.26      | Igfbp4                                              | -75.30      | Igfbp4                                              | -22.86      | Igfbp4                               | -15.19      |
| Igfbp4                        | -127.92     | Igfbp4                                              | -126.34     | Igfbp4                                              | -23.46      | Ampd1                                | -15.47      |

**Supplemental Table 1. Top 100 signature genes from each subset relative to naive.**  
 The average log2 transformed relative expression intensities of day 8 PSGL1<sup>lo</sup> Ly6C<sup>lo</sup>, day 8 PSGL1<sup>hi</sup> Ly6C<sup>hi</sup>, day 8 PSGL1<sup>hi</sup> Ly6C<sup>lo</sup>, and day 60 PSGL1<sup>hi</sup> memory Stg compared to naive Stg mRNA from Illumina microarrays.
